# Supplementary material for: Does Oxidative Stress Play a Role in Altered Characteristics of Diabetic Bone? A Systematic Review
Source: Springer Nature journal article supplement (doi:10.1007/s00223-017-0327-7), 2017-10-24
Supplement: MOESM2 [file 15158884]

1. Feng YF, Wang L, Zhang Y, Li X, Ma ZS, Zou JW, et al. Effect of reactive oxygen species overproduction on osteogenesis of porous titanium implant in the present of diabetes mellitus. Biomaterials. 2013;34(9):2234-43.

2. Fujii H, Hamada Y, Fukagawa M. Bone formation in spontaneously diabetic Torii-newly established model of non-obese type 2 diabetes rats. Bone. 2008;42(2):372-9.

3. Goto S, Fujii H, Kono K, Nakai K, Awata R, Yonekura Y, et al. 22-Oxacalcitriol attenuates bone loss in nonobese type 2 diabetes. Bone. 2015;74:153-9.

4. Goto S, Fujii H, Kono K, Nakai K, Hamada Y, Yamato H, et al. Carvedilol ameliorates low-turnover bone disease in non-obese type 2 diabetes. American journal of nephrology. 2011;34(3):281-90.

5. Hamada Y, Fujii H, Kitazawa R, Yodoi J, Kitazawa S, Fukagawa M. Thioredoxin-1 overexpression in transgenic mice attenuates streptozotocin-induced diabetic osteopenia: a novel role of oxidative stress and therapeutic implications. Bone. 2009;44(5):936-41.

6. Hamada Y, Kitazawa S, Kitazawa R, Fujii H, Kasuga M, Fukagawa M. Histomorphometric analysis of diabetic osteopenia in streptozotocin-induced diabetic mice: a possible role of oxidative stress. Bone. 2007;40(5):1408-14.

7. Li X, Ma XY, Feng YF, Ma ZS, Wang J, Ma TC, et al. Osseointegration of chitosan coated porous titanium alloy implant by reactive oxygen species-mediated activation of the PI3K/AKT pathway under diabetic conditions. Biomaterials. 2015;36:44-54.

8. Liang W, Luo Z, Ge S, Li M, Du J, Yang M, et al. Oral administration of quercetin inhibits bone loss in rat model of diabetic osteopenia. European journal of pharmacology. 2011;670(1):317-24.

9. Portal-Nunez S, Ardura JA, Lozano D, Bolivar OH, Lopez-Herradon A, Gutierrez-Rojas I, et al. Adverse Effects of Diabetes Mellitus on the Skeleton of Aging Mice. J Gerontol A Biol Sci Med Sci. 2016;71(3):290-9.

10. Yildirimturk S, Batu S, Alatli C, Olgac V, Firat D, Sirin Y. The effects of supplemental melatonin administration on the healing of bone defects in streptozotocin-induced diabetic rats. J Appl Oral Sci. 2016;24(3):239-49.

*Appendix II.* The selected studies
