# Supplementary material for: Does Oxidative Stress Play a Role in Altered Characteristics of Diabetic Bone? A Systematic Review
Source: Springer Nature journal article supplement (doi:10.1007/s00223-017-0327-7), 2017-10-24
Supplement: MOESM3 [file 15158884]

| **Focus question(s)** | Is oxidative stress status associated with diabetic bone features under invivo conditions?  Does insulin or antioxidants treatment improve the diabetic bone features of DM subjects? | |
| --- | --- | --- |
| **Population** | “diabetes” OR “diabetic” OR “hyperglycemia” OR “advanced glycation end products” OR “AGE*” | **A**  **N**  **D** |
| **Intervention** | “diabetic bone disease” OR “DBD” OR “bone healing” OR “bone defect*” OR “bone fracture*” OR “bone remodel*” OR “bone regenerat*” OR “bone formation” OR “bone repair*” OR “bone augment*” OR “bone reconstruct*” OR “bone engineering” OR “bone graft*” OR “osteogenesis” OR “osseointegration” OR “osteointegration” |
| **Outcome** | “oxidative stress” OR “endoplasmic reticulum stress” OR “mitochondrial stress” OR “reactive oxygen species” OR “ROS” OR “oxygen free radical*” OR “free radical*” OR “oxidation product*” |
| **Limits** | None |

*Appendix III.* The algorithm used for electronic search in PubMed
